# Supplementary material
Source: publisher figshare collection journal article supplement (https://tandf.figshare.com/ndownloader/files/17727227)
Supplement: Supplementary file 1 [file 17727227]

**Supplemental Digital Content 1** The rates of sudden sensorineural hearing loss (SSNHL) in herpes zoster participants when participants who had SSNHL before diagnosis of herpes zoster are included in the analysis.

| Characteristic | | Total participants | |
| --- | --- | --- | --- |
|  |  | Herpes zoster group (n, %) | Control group (n, %) |
| SSNHL | |  |  |
|  | Yes | 652 (1.0) | 4,592 (0.4) |
|  | No | 61,930 (99.0) | 1,058,517 (99.6) |

SSNHL: sudden sensorineural hearing loss
